# Supplementary material for: Effect of synergy on selective low-temperature dehydrogenation of propane to propylene over a defect-induced copper titanium catalyst
Source: Royal Society of Chemistry journal article supplement (doi:10.1039/d5lf00031a), 2025-01-01
Supplement: d5lf00031a1.pdf [file d5lf00031a1.pdf]

## Supporting Information

### Effect of Synergy on Selective Low-Temperature Dehydrogenation of Propane to Propylene over Defect-Induced Copper Titanium Catalyst

Himanshu Raghav, Tuhin Suvra Khan, A V Sri Jyotsna, Piyush Gupta, Shailendra Tripathi and Bipul Sarkar\*

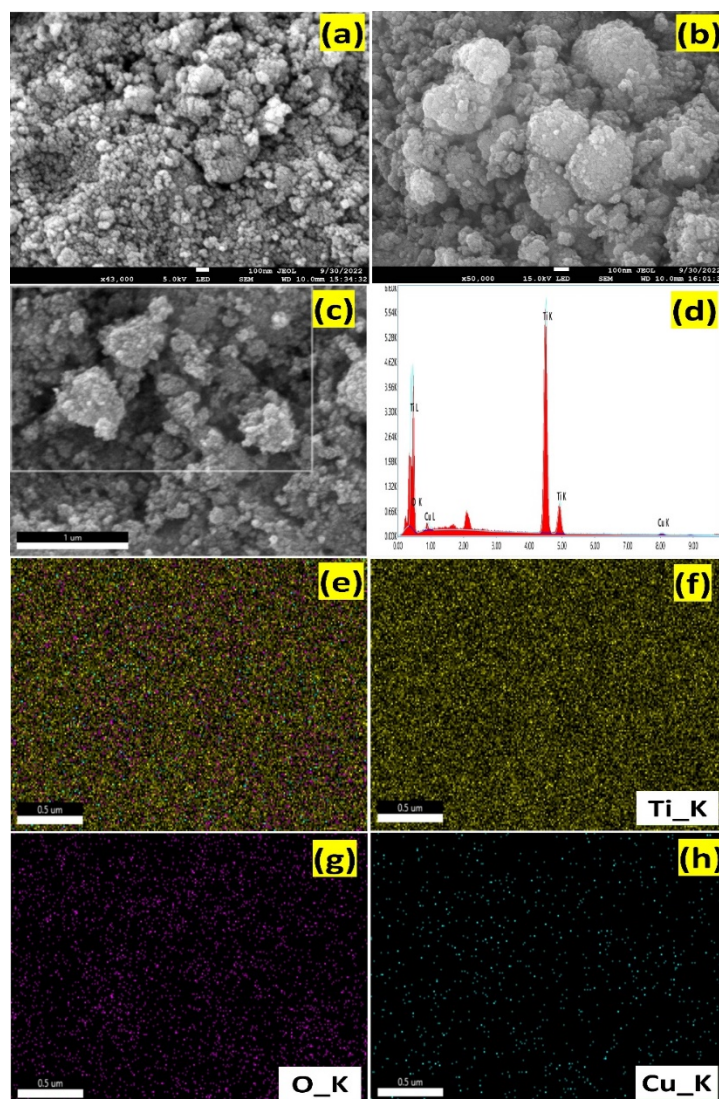

**Figure.S1** SEM images of (a-c) Fresh Cu-TiO<sub>2</sub> (d-e) and its corresponding EDS image and mapping of (f)Ti, (g) O, and (h) Cu for fresh Cu-TiO<sub>2</sub> catalyst

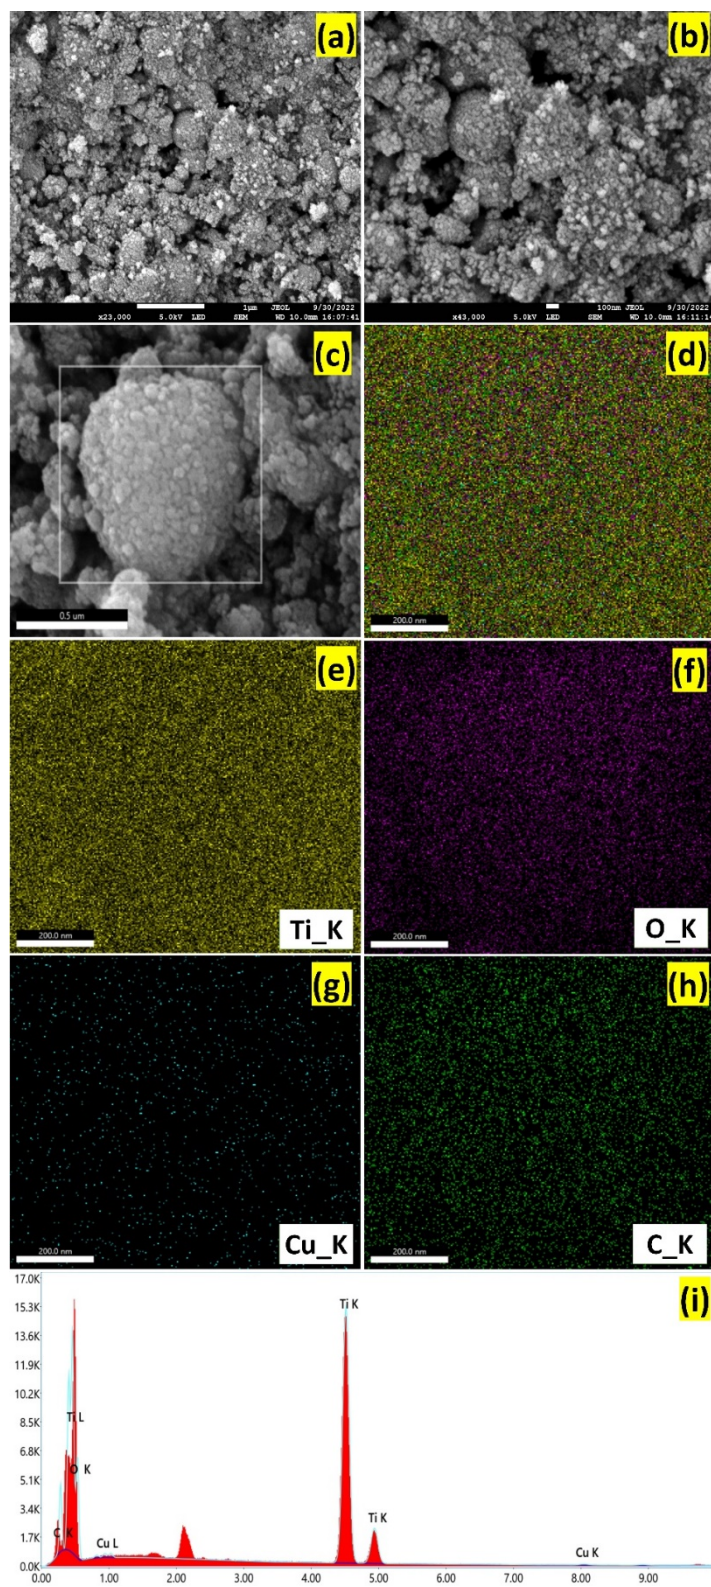

**Figure.S2** SEM images of (a-c) spent Cu-TiO<sub>2</sub> (d) Elemental mapping of (e)Ti, (f) O, (g) Cu, (h) C, and (i) its corresponding EDS image for spent Cu-TiO<sub>2</sub> catalyst



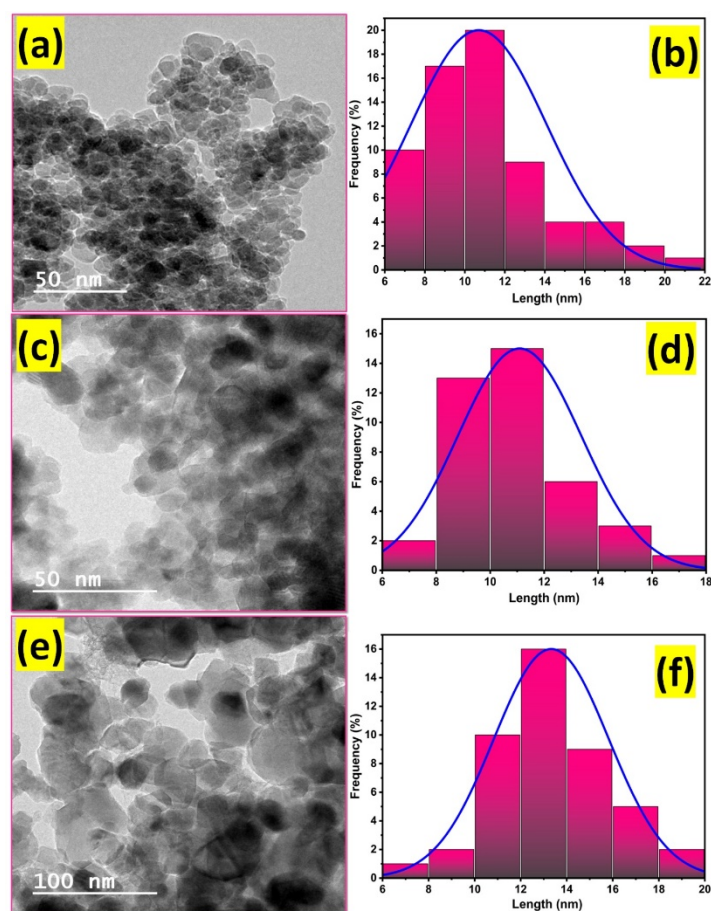

**Figure.S3** HRTEM analysis at 50 nm,50 nm and 100 nm resolution of the finely dispersed nanoparticles and their size distribution in the fresh (a-b)  $\text{TiO}_2$  (c-d) fresh and (e-f) spent  $\text{Cu-TiO}_2$  catalyst, respectively.

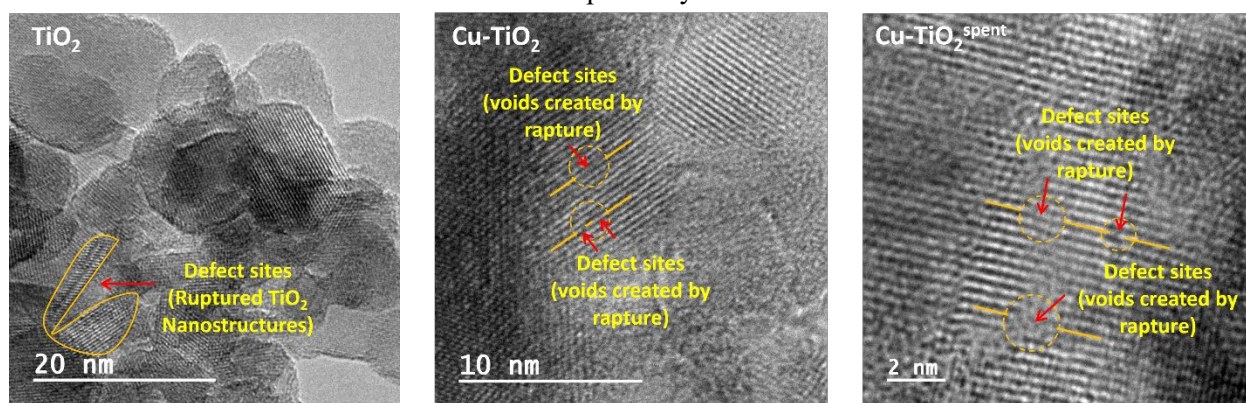

**Figure. S4** HRTEM analysis of  $\text{TiO}_2$  and fresh & spent  $\text{Cu-TiO}_2$  catalyst, indicating defective sites and voids in lattice fringes that resulted in defects.

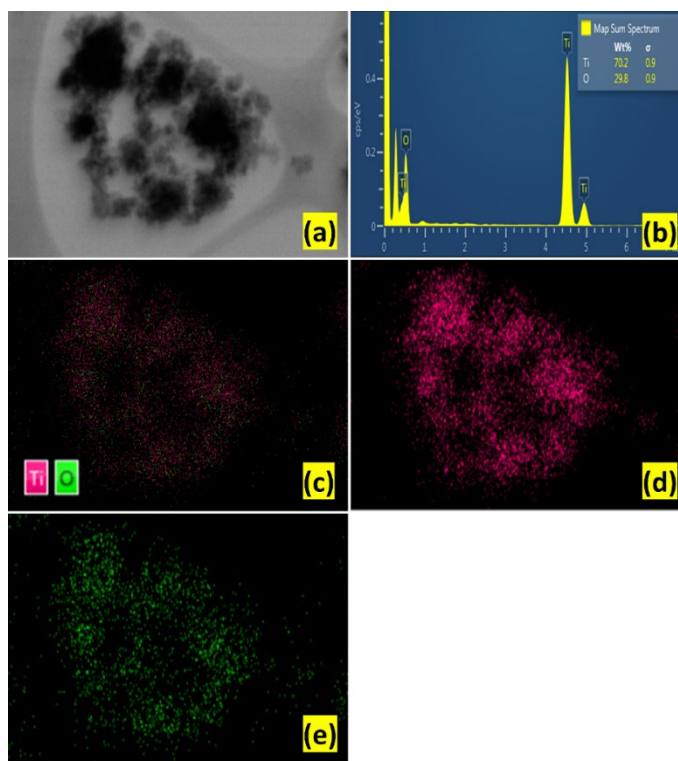

**Figure S5.** (a) HRTEM image (b) and its corresponding EDS image and (c) elemental mapping of (d) Ti, and (e) O for fresh  $\text{TiO}_2$  catalyst

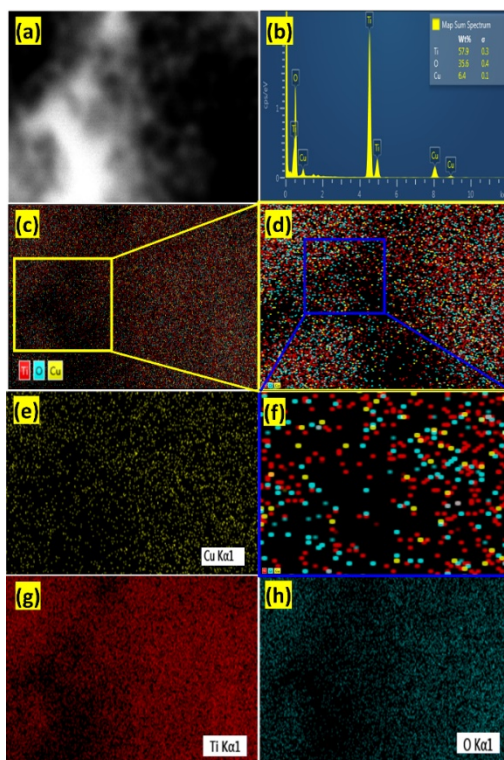

**Figure S6.** (a) HRTEM image (b) and its corresponding EDS image and (c-d & f) elemental mapping of (e) Cu, (g) Ti, and (h) O for fresh  $\text{Cu-TiO}_2$  catalyst

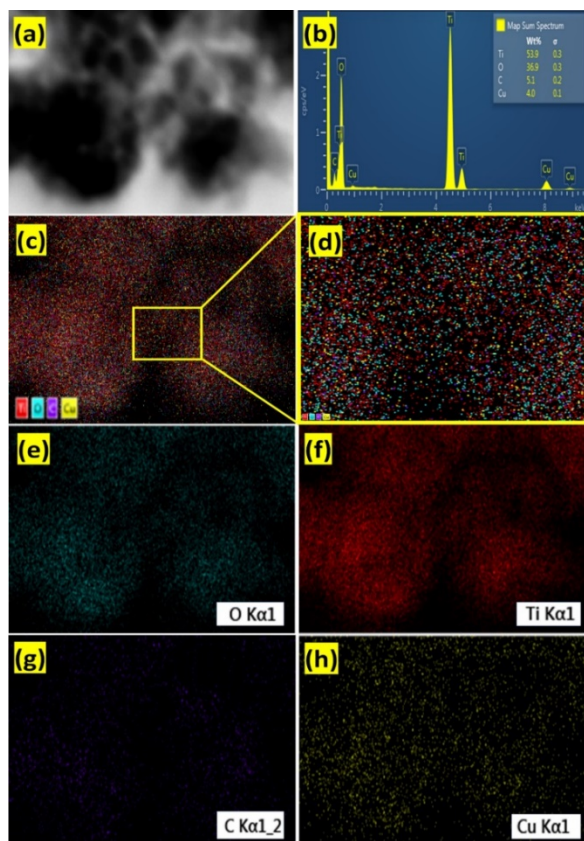

**Figure S7.** (a) HRTEM image (b) and its corresponding EDS image and (c-d) elemental mapping of (e) O, (f) Ti, (g) C, and (h) Cu for spent Cu-TiO<sub>2</sub> catalyst

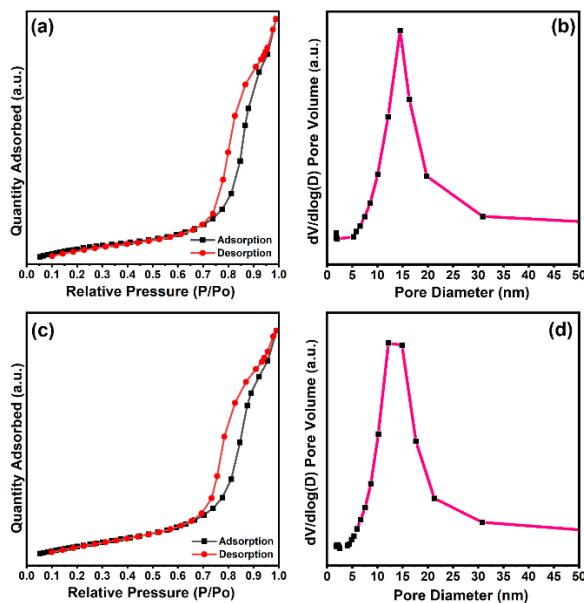

**Figure S8.** N<sub>2</sub> adsorption-desorption isotherm with Pore size distribution of (a) fresh and (b) spent Cu-TiO<sub>2</sub> catalysts.

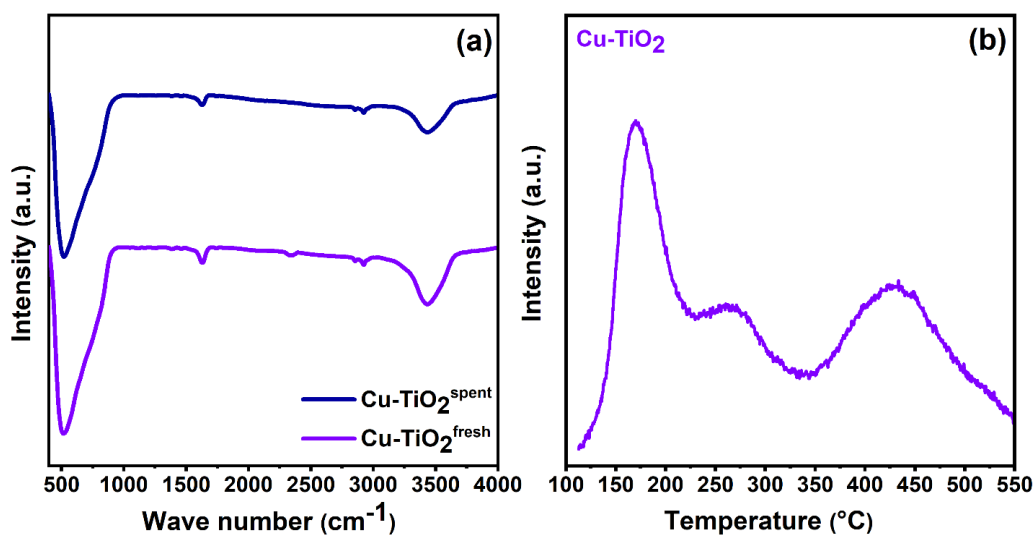

**Figure S9.** (a) FTIR spectra for fresh and spent [Cu-TiO<sub>2</sub>] catalysts, (b) H<sub>2</sub>-TPR spectra for fresh [Cu-TiO<sub>2</sub>] catalysts.

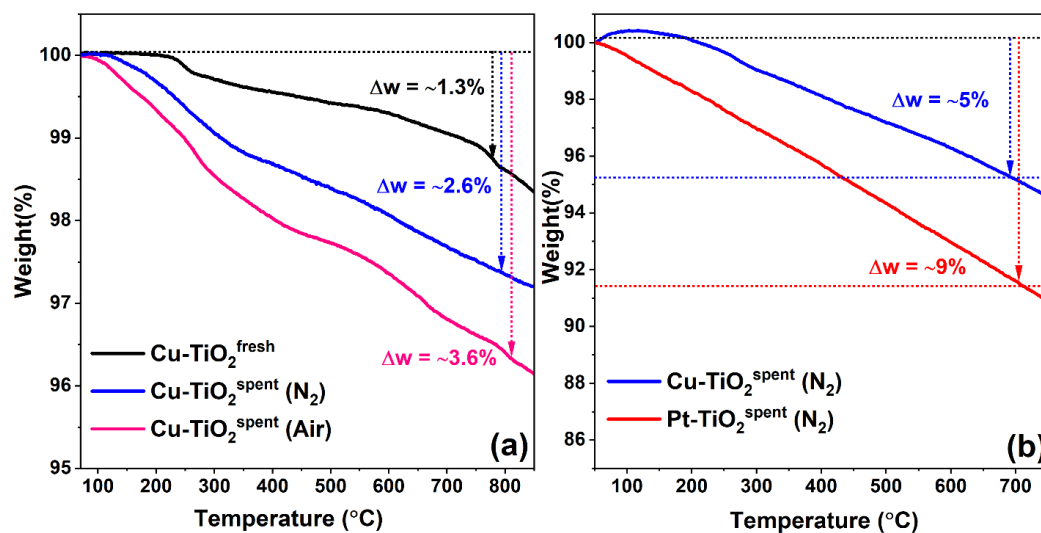

**Figure S10.** Thermogravimetric analysis profile of (a) fresh and spent Cu-TiO<sub>2</sub> catalyst was recovered after 5h time-on-stream (b) TGA profile of Cu-TiO<sub>2</sub> and Pt-TiO<sub>2</sub> Spent catalyst was recovered after 24h time-on-stream.



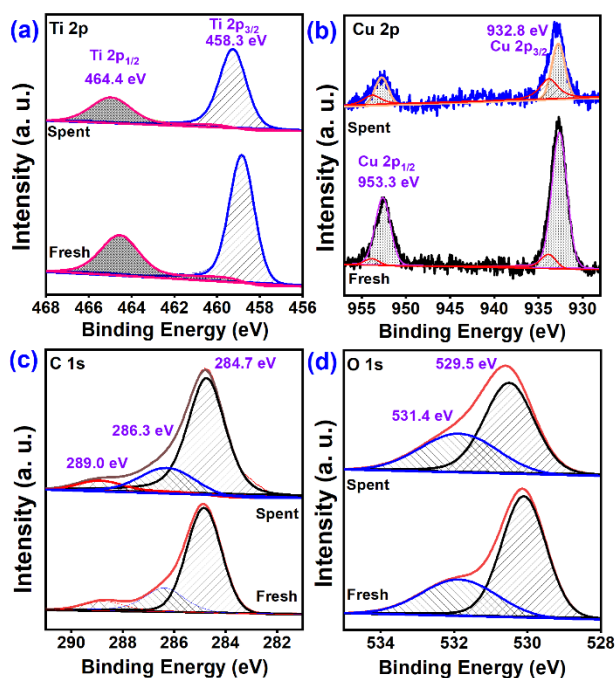

**Figure S11.** XPS high-resolution scans of (a) Ti 2p, (b) Cu 2p, (c) C 1s and, (d) O 1s electrons of fresh (down) and spent (up) [Cu-TiO<sub>2</sub>] catalysts.

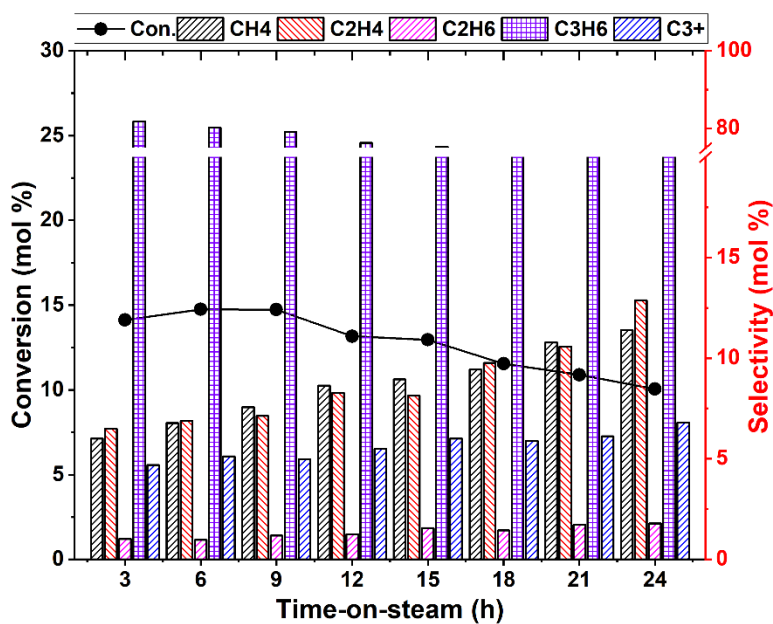

**Figure S12.** TOS data of the [Pt-TiO<sub>2</sub>] catalyst for C<sub>3</sub>H<sub>8</sub> conversion and selectivity of C<sub>3</sub>H<sub>6</sub>. Reaction conditions: Wt. of catalyst-0.25 g (pelletized); reaction temperature, 375 °C; GHSV-4000 h<sup>-1</sup>

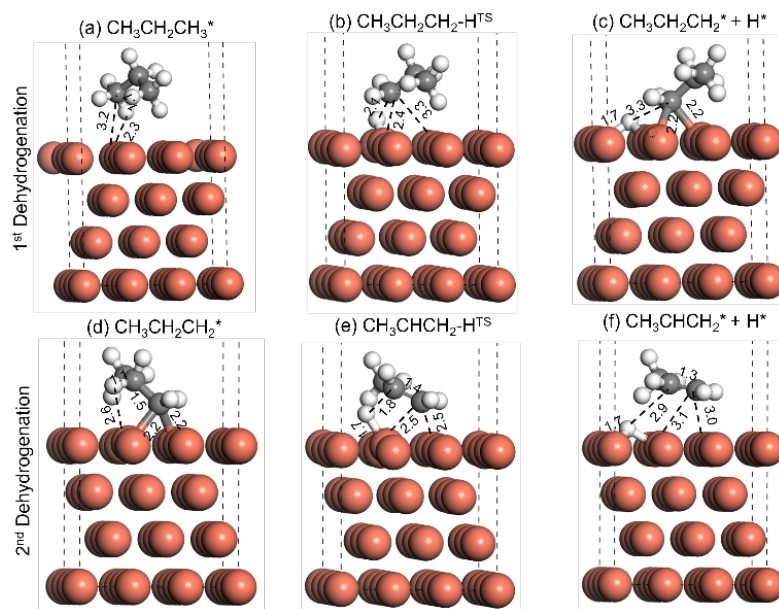

**Figure S13.** DFT optimized geometry for adsorbates and TS during the propane dehydrogenation to propylene, showing the (a – c) 1st dehydrogenation and (d -f) 2nd dehydrogenation.

**Table S1 Summary of performance of different catalysts for dehydrogenation of Propane to Propylene.**

| Sl. No | Catalyst                             | Propane Conv. (%) | Selectivity (%) |                               |                               |                               |                  | Propylene Yield | Total Olefin Yield | Production Rate of Propylene ( $\times 10^{-7}$ mmol.g <sup>-1</sup> .min <sup>-1</sup> ) |
|--------|--------------------------------------|-------------------|-----------------|-------------------------------|-------------------------------|-------------------------------|------------------|-----------------|--------------------|-------------------------------------------------------------------------------------------|
|        |                                      |                   | CH <sub>4</sub> | C <sub>2</sub> H <sub>6</sub> | C <sub>2</sub> H <sub>4</sub> | C <sub>3</sub> H <sub>6</sub> | C <sub>3</sub> + |                 |                    |                                                                                           |
| 1      | Pt/Al <sub>2</sub> O <sub>3</sub>    | 4.07              | 3.52            | 0.34                          | 5.59                          | 88.94                         | 1.61             | 3.62            | 3.91               | 7.93                                                                                      |
| 2      | Pt-Sn/Al <sub>2</sub> O <sub>3</sub> | 1.57              | 2.19            | 0.1                           | 4.34                          | 89.81                         | 3.56             | 1.41            | 1.53               | 7.01                                                                                      |
| 3      | Ti-/Al <sub>2</sub> O <sub>3</sub>   | 2.35              | 4.72            | 1.31                          | 8.12                          | 84.61                         | 1.24             | 1.99            | 2.21               | 7.55                                                                                      |
| 4      | Cu/Al <sub>2</sub> O <sub>3</sub>    | 2.75              | 3.75            | 0.17                          | 8.34                          | 83.78                         | 3.96             | 2.30            | 2.64               | 7.47                                                                                      |
| 5      | Pt/MnO <sub>2</sub>                  | 1.18              | 10.37           | 0.87                          | 19.44                         | 64.19                         | 5.13             | 0.76            | 1.05               | 5.73                                                                                      |
| 6      | Cu/MnO <sub>2</sub>                  | 1.03              | 8.66            | 0.59                          | 21.64                         | 62.84                         | 6.27             | 0.65            | 0.93               | 5.61                                                                                      |
| 7      | Pt/ZrO <sub>2</sub>                  | 1.98              | 7.54            | 0.41                          | 14.35                         | 56.84                         | 20.86            | 1.13            | 1.82               | 5.07                                                                                      |
| 8      | Cu/ZrO <sub>2</sub>                  | 3.37              | 9.15            | 1.71                          | 18.5                          | 51.41                         | 19.23            | 1.73            | 3.00               | 4.59                                                                                      |
| 9      | Pt/TiO <sub>2</sub>                  | 5.59              | 3.59            | 0.68                          | 5.94                          | 84.13                         | 5.66             | 4.70            | 5.35               | 7.50                                                                                      |
| 10     | Cu/TiO <sub>2</sub>                  | 5.29              | 0.85            | 0.19                          | 1.94                          | 95.97                         | 1.05             | 5.08            | 5.23               | 8.56                                                                                      |
| 11     | Cu/CeO <sub>2</sub>                  | 3.53              | 13.47           | 1.58                          | 21.53                         | 58.64                         | 4.78             | 2.07            | 2.83               | 5.23                                                                                      |



Condition: catalyst wt.-0.25 g (pallet form); GHSV- 6000 h<sup>-1</sup>; reaction temp.-350°C; N<sub>2</sub>:C<sub>3</sub>H<sub>8</sub>- 4:1; reaction time-5 hours. The relative standard deviation (RSD) is ±3%.

**Table S2 Summary of performance of different catalysts for dehydrogenation of Propane to Propylene**

| Sl. No | Catalyst            | Propane Conv. (%) | Selectivity (%) |                               |                               |                               |                  | Propylene Yield | Total Olefin Yield | Production Rate of Propylene x10 <sup>-7</sup> mmol.g <sup>-1</sup> .min <sup>-1</sup> ) |
|--------|---------------------|-------------------|-----------------|-------------------------------|-------------------------------|-------------------------------|------------------|-----------------|--------------------|------------------------------------------------------------------------------------------|
|        |                     |                   | CH <sub>4</sub> | C <sub>2</sub> H <sub>6</sub> | C <sub>2</sub> H <sub>4</sub> | C <sub>3</sub> H <sub>6</sub> | C <sub>3</sub> + |                 |                    |                                                                                          |
| 1      | TiO <sub>2</sub>    | 5.21              | 1.83            | 0.38                          | 3.95                          | 92.36                         | 1.48             | 4.81            | 5.02               | 8.24                                                                                     |
| 2      | Cu/TiO <sub>2</sub> | 8.39              | 0.66            | 0.13                          | 1.27                          | 96.65                         | 1.29             | 8.11            | 8.22               | 8.62                                                                                     |

Condition: catalyst wt.-0.25 g (pallet form); GHSV- 4000 h<sup>-1</sup>; reaction temp.-350°C; N<sub>2</sub>:C<sub>3</sub>H<sub>8</sub>- 6:1; reaction time-5 hours. The relative standard deviation (RSD) is ±3%.

### **Elementary steps taken for DFT study**

DFT study was used to understand the propane dehydrogenation (PDH) and possible coking and lights products like CH<sub>4</sub>/CH<sub>2</sub>CH<sub>2</sub>. The following surface mechanism with elementary reaction steps for PDH, coke formation and lights formation as given below,

R1. CH<sub>3</sub>CH<sub>2</sub>CH<sub>3</sub> → CH<sub>3</sub>CH<sub>2</sub>CH<sub>2</sub> + H (PDH\_step1)

R2. CH<sub>3</sub>CH<sub>2</sub>CH<sub>2</sub> → CH<sub>3</sub>CHCH<sub>2</sub> + H (PDH\_step2)

R3. CH<sub>3</sub>CHCH<sub>2</sub> → CH<sub>3</sub>CHCH + H (coke formation)

R4. CH<sub>3</sub>CH<sub>2</sub>CH<sub>2</sub> → CH<sub>3</sub>CH<sub>2</sub> + CH<sub>2</sub> (CH<sub>4</sub>/CH<sub>2</sub>CH<sub>2</sub> formation)

### **Mass Transfer Calculations for PDH Reaction with Cu/TiO<sub>2</sub> Catalyst**

Weisz-Prater Criterion for Internal Diffusion (Elements of Chemical Reaction Engineering, Fogler 5<sup>th</sup> edition)

If  $C_{WP} = \frac{-r'_{A(obs)}\rho_c R^2}{D_e C_{Ps}} < 1$ , then internal mass transfer effects can be neglected.

The parameters were determined using the provided formulas. Another option for calculating the internal mass transfer limitation is by performing a theoretical analysis after conducting a preliminary kinetic

modeling study, as mentioned in Oyama et al.'s report (reference 21). To estimate the internal mass transfer, the calculation was based on the Weisz-Prater criterion, expressed as follows:

$$C_{WP} = \frac{-r'_{A(obs)} \rho_c R^2}{D_e C_{Ps}}$$

The provided parameters were determined through various calculations:

The reaction rate  $r'_{A(obs)}$  in (kmol.kg<sup>-1</sup>.s<sup>-1</sup>), dependent on total conversion, reactant flow rate, and catalyst weight, was obtained from kinetic modeling calculations.

The density  $\rho_c$  (kg.m<sup>-3</sup>) of the solid catalyst was experimentally determined by suspending the pelletized catalyst in water.

The average particle radius of the catalyst  $R$  (m) was calculated from HR-TEM images.

The effective gas-phase diffusivity  $D_e$  (m<sup>2</sup>.s<sup>-1</sup>) for the propane-nitrogen system was appropriately estimated using the Lennard-Jones expression forces and kinetic theory.

$C_{Ps}$  (kmol.m<sup>-3</sup>) represents the gas concentration of propane (P) at the catalyst surface (s) per unit time.

The detailed calculations for each parameter are provided in the supporting information as follows.

Based on the value of  $C_{WP}$ :

If  $C_{WP} \ll 1$ , the internal mass transfer limitation can be neglected.

If  $C_{WP} > 1$ , the diffusion behavior significantly affects the overall reaction conversion.

### **Rate calculation:**

$$r'_{A(obs)} = \frac{X_{C_3H_8} \cdot F_{C_3H_8}}{W_{cat.}}$$

$$X_{C_3H_8} = 0.0879$$

$$F_{C_3H_8} = 7.5 \times 10^{-7} \text{ kmol.s}^{-1}$$

$$W_{cat.} = 2.5 \times 10^{-4} \text{ kg}$$

$$r'_{A(obs)} = \frac{X_{C_3H_8} \cdot F_{C_3H_8}}{W_{cat.}} = 2.746 \times 10^{-4} \text{ kmol.kg}^{-1}.\text{s}^{-1}$$

### **Solid catalyst density calculation:**

$$\rho_c = \frac{\text{wt of catalyst}}{\text{volume displaced by catalyst}} = \frac{0.89}{0.3} \text{ g.ml}^{-1} = 2.96 \times 10^3 \text{ kg.m}^{-3}$$

### **Average particle radius calculation:**

Average particle radius of the catalyst was measured from the HR-TEM images of the catalyst.

$$R = 11 \times 10^{-9} \text{ m}$$

**Effective gas-phase diffusivity calculation:**

$$D_e = \frac{A \cdot T^{3/2} \sqrt{\frac{1}{M_{propane}} + \frac{1}{M_{nitrogen}}}}{\rho \cdot \sigma_{pn}^2 \cdot \Omega}$$

$$A = 1.859 \times 10^{-3} \frac{atm \cdot \text{\AA}^2 \cdot cm^2 \cdot \sqrt{g/mol}}{K^{3/2} \cdot s}$$

$$T = 623 \text{ K}$$

$$M_{propane} = 44; M_{nitrogen} = 28$$

$$\sigma_{pn} = \frac{\sigma_{propane} + \sigma_{nitrogen}}{2} = 4.11 \text{ \AA}; \text{ Average collision diameter } (\sigma_{propane} = 4.77 \text{ \AA}; \sigma_{nitrogen} = 3.45 \text{ \AA})$$

$$\Omega \sim 1; \text{ collision integral (dimensionless)}$$

$$D_e = 1.39 \times 10^{-4} m^2 \cdot s^{-1}$$

**Gas concentration of Propane (P) at the catalyst surface (s) calculation:**

$C_{Ps} = \frac{0.045 \text{ moles}}{0.068 \text{ ml}} = 0.66 \text{ moles} \cdot ml^{-1} = 11 \text{ kmol} \cdot m^{-3}$ ; molecules of propane interacting at the catalyst surface in per unit time.

**Table.S3** Calculated parameters for the Weisz-Prater criterion

| Parameters     | Value                                                          |
|----------------|----------------------------------------------------------------|
| $-r'_{A(obs)}$ | $2.746 \times 10^{-4} \text{ kmol} \cdot kg^{-1} \cdot s^{-1}$ |
| $\rho_c$       | $2.96 \times 10^3 \text{ kg} \cdot m^{-3}$                     |
| $R$            | $11 \times 10^{-9} \text{ m}$                                  |
| $D_e^*$        | $1.39 \times 10^{-4} m^2 \cdot s^{-1}$                         |
| $C_{Ps}$       | $11 \text{ kmol} \cdot m^{-3}$                                 |

\* Mole-average diffusivity of propane in propane -nitrogen feed mixture

 **$C_{WP}$  Calculation:**

$$C_{WP} = \frac{-r'_{A(obs)} \rho_c R^2}{D_e C_{Ps}} = \frac{(2.746 \times 10^{-4}) \times (2.96 \times 10^3) \times (11 \times 10^{-9})^2}{(1.39 \times 10^{-4}) \times 11}$$

$$C_{WP} = 6.418 \times 10^{-14} \ll 1$$

The value of the  $C_{WP}$  was calculate as  $6.418 \times 10^{-14}$  which was significantly less than 1. Hence, the internal mass transfer limitations can be eliminated.

**Mears criterion**

$$= \frac{-r'_{A(obs)} R^2}{D_e C_{Ps}} = \frac{(2.746 \times 10^{-4}) \times (11 \times 10^{-9})^2}{(1.39 \times 10^{-4}) \times 11} = 2.17 \times 10^{-17}$$

## KINETICS STUDY

The effect of temperature on the reaction rates and product formation over Cu-TiO<sub>2</sub> was investigated at relatively low temperature 350-400 °C using appropriate *W:F* ratios to obtain low conversions (<50%). The experimental data was collected after 5h to ensure that a steady state was reached, and stable performance was achieved.

**Rate Equations:** The numerical values of the conversion, rate and partial pressures are given in the following table. The readings were taken for three temperatures (350, 375 and 400 °C) at varying flow rate of N<sub>2</sub> and C<sub>3</sub>H<sub>8</sub>.

| 1) T= 350 °C <span style="float:right">W<sub>cat</sub>=0.25 g</span> |                                 |                                   |                                                                  |                                                                                   |
|----------------------------------------------------------------------|---------------------------------|-----------------------------------|------------------------------------------------------------------|-----------------------------------------------------------------------------------|
| Propane flow rate (ml/min)                                           | Nitrogen gas flow rate (ml/min) | Partial pressure of propane (atm) | Conversion of Propane (X <sub>C<sub>3</sub>H<sub>8</sub></sub> ) | Rate of propane consumption (R <sub>C<sub>3</sub>H<sub>8</sub></sub> ) in mol/g.s |
| 5.55                                                                 | 11.11                           | 0.332197                          | 4.89                                                             | 0.034875502                                                                       |
| 3.3                                                                  | 13.3                            | 0.198124                          | 7.31                                                             | 0.030999161                                                                       |
| 2.38                                                                 | 14.28                           | 0.142342                          | 8.39                                                             | 0.025660052                                                                       |

| 2) T=375 °C <span style="float:right">W<sub>cat</sub>= 0.25 g</span> |                                 |                                   |                                                                  |                                                                                   |
|----------------------------------------------------------------------|---------------------------------|-----------------------------------|------------------------------------------------------------------|-----------------------------------------------------------------------------------|
| Propane flow rate (ml/min)                                           | Nitrogen gas flow rate (mL/min) | Partial pressure of propane (atm) | Conversion of Propane (X <sub>C<sub>3</sub>H<sub>8</sub></sub> ) | Rate of propane consumption (R <sub>C<sub>3</sub>H<sub>8</sub></sub> ) in mol/g.s |
| 5.55                                                                 | 11.11                           | 0.331482                          | 6.72                                                             | 0.047784                                                                          |
| 3.3                                                                  | 13.3                            | 0.197613                          | 8.91                                                             | 0.037784                                                                          |
| 2.38                                                                 | 14.28                           | 0.141948                          | 11.4                                                             | 0.034866                                                                          |

| 3) T= 400 °C <span style="float:right">W<sub>cat</sub>=0.25 g</span> |                                 |                                   |                                                                  |                                                                                   |
|----------------------------------------------------------------------|---------------------------------|-----------------------------------|------------------------------------------------------------------|-----------------------------------------------------------------------------------|
| Propane flow rate (ml/min)                                           | Nitrogen gas flow rate (mL/min) | Partial pressure of propane (atm) | Conversion of Propane (X <sub>C<sub>3</sub>H<sub>8</sub></sub> ) | Rate of propane consumption (R <sub>C<sub>3</sub>H<sub>8</sub></sub> ) in mol/g.s |
| 5.55                                                                 | 11.11                           | 0.331398                          | 9.28                                                             | 0.066185                                                                          |
| 3.3                                                                  | 13.3                            | 0.197552                          | 12.56                                                            | 0.053263                                                                          |
| 2.38                                                                 | 14.28                           | 0.141902                          | 14.26                                                            | 0.043613                                                                          |

Various rate equations are determined and tested for the reaction.



**A. First of all, power law rate equation is assumed.**

$$R_{C_3H_8} = k(p_{C_3H_8})^m \quad \text{Equ ..... (a)}$$

In this equation,  $R$  is the rate of propane consumption,  $p_{C_3H_8}$  is the partial pressure of propane and  $k$ ,  $m$  are the constants to be determined.

To determine the constants  $k$  and  $m$ , a graph between  $\ln R$  (y axis) and  $\ln p$  (x axis) is plotted having  $R$  as dependent variable and  $p$  as independent variable. The graph gives the linear line with slope  $m$  and intercept as  $\ln k$ .

Graphs for the three different temperatures have been shown in Fig. 1 a, b, c.

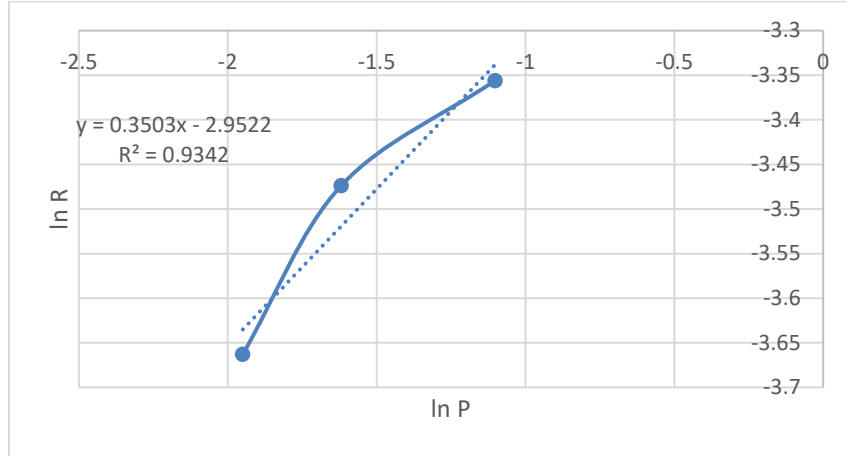

Fig 1 a)  $T = 350^\circ\text{C}$

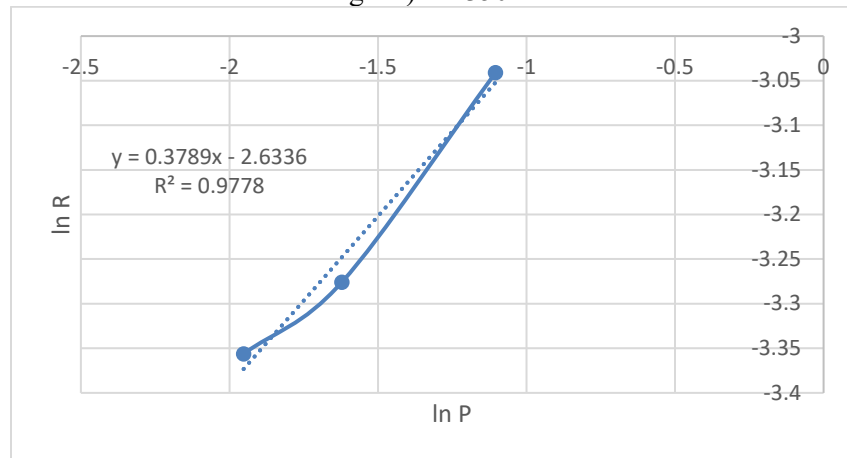

Fig 1 b)  $T = 375^\circ\text{C}$

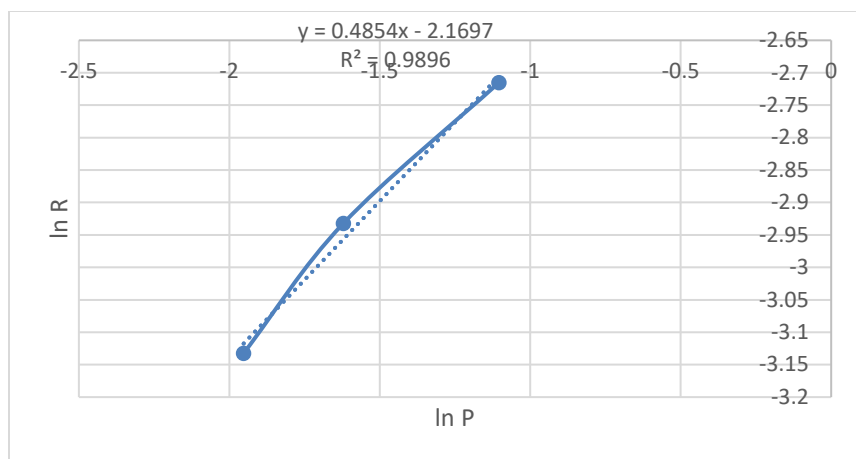

Fig 1 c) T= 400 °C

From these graphs k and m values have been determined and written in the tabular form as follows:

| Temperature (°C) | Value of m parameter | k value ( $\mu\text{mol/g.s.atm}$ ) | Rate expression for Propane       |
|------------------|----------------------|-------------------------------------|-----------------------------------|
| 350              | 0.35027876           | 0.052224001                         | $R=0.052224 \cdot p^{0.35027876}$ |
| 375              | 0.37887895           | 0.071819396                         | $R=0.071819 \cdot p^{0.378879}$   |
| 400              | 0.48543688           | 0.114217165                         | $R=0.114217 \cdot p^{0.485437}$   |

The catalyst used in this reaction is heterogeneous catalyst. Hence for developing the kinetic equation, we should consider the three steps adsorption, surface reaction and desorption by neglecting the diffusion processes.

Consider the reaction  $2P \rightleftharpoons E + H$

Where P= propane, E for Propylene and H for Hydrogen

Now we have to propose the mechanism for the reaction. We may consider the following steps occurring throughout the reaction neglecting the internal and external diffusions.

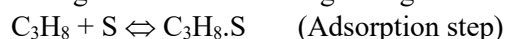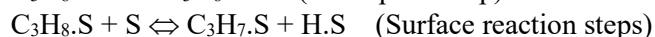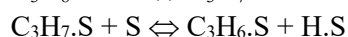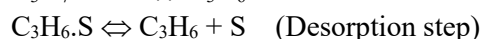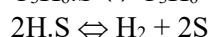

Here S represents the vacant site and  $C_3H_8.S$ ,  $C_3H_7.S$ ,  $C_3H_6.S$  and  $H.S$  represents that the respective species have occupied the site.

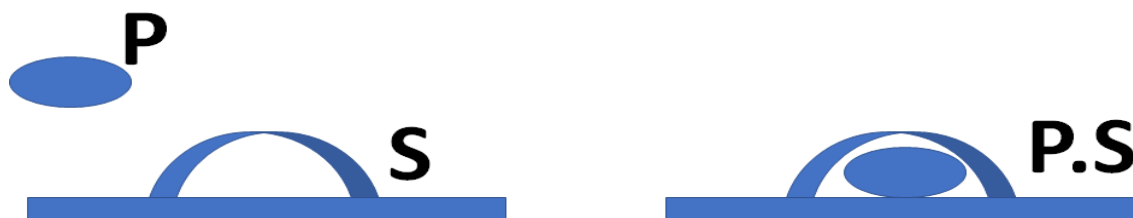

This figure represents the vacant site and the occupied sites respectively.

For developing the kinetic equation consider one by one the three steps as the rate limiting step. The slowest step in the reaction is considered as rate limiting step because the whole reaction is governed by that step as other steps are considered to be fast. After the assumption one equation is developed and then

that equation is matched with the experimental results.

## B) Adsorption as rate limiting step

First consider adsorption as the rate limiting step having the main reaction as

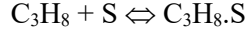

Let  $k_1$  and  $k_{-1}$  be the rate constants for the forward (adsorption) and backward (desorption) reactions. Then rate of propane adsorption is given by  $r_A = k_1 \cdot S_v \cdot P_{\text{C}_3\text{H}_8}$  and methanol desorption is  $r_{-1} = k_{-1} \cdot S_{\text{C}_3\text{H}_8.\text{S}}$  where  $S_v$  and  $S_{\text{C}_3\text{H}_8.\text{S}}$  are the concentrations of the vacant sites and the occupied sites respectively.

Combining these two equations we get the net rate of adsorption as  $R_A = k_1 \cdot S_v \cdot P_{\text{C}_3\text{H}_8} - k_{-1} \cdot S_{\text{C}_3\text{H}_8.\text{S}}$

Solving this equation, we get  $R_A = k_1 \left( S_v \cdot P_{\text{C}_3\text{H}_8} - \frac{k_{-1} \cdot S_{\text{C}_3\text{H}_8.\text{S}}}{k_1} \right)$

$$R_A = k_1 \left( S_v \cdot P_{\text{C}_3\text{H}_8} - \frac{S_{\text{C}_3\text{H}_8.\text{S}}}{K_A} \right) \dots \dots \dots (A)$$

where  $K_A = k_1/k_{-1}$  and is known as equilibrium constant. This equation is also known as Langmuir adsorption isotherm.

Now surface reaction and desorption steps are very fast so consider their rates to be zero.

Surface reaction is  $\text{C}_3\text{H}_8.\text{S} + \text{S} \rightleftharpoons \text{C}_3\text{H}_7.\text{S} + \text{H}.\text{S}$  and let  $k_2$  and  $k_{-2}$  be the rate constants for forward and backward reactions. Then  $R_{S1} = k_2 \cdot S_{\text{C}_3\text{H}_8.\text{S}} \cdot S_S - k_{-2} \cdot S_{\text{C}_3\text{H}_7.\text{S}} \cdot S_{\text{H}.\text{S}}$  or  $k_2 (S_{\text{C}_3\text{H}_8.\text{S}} \cdot S_S - \frac{k_{-2} \cdot S_{\text{C}_3\text{H}_7.\text{S}} \cdot S_{\text{H}.\text{S}}}{k_2})$

$$R_{S1} = k_2 \left( S_{\text{C}_3\text{H}_8.\text{S}} \cdot S_S - \frac{S_{\text{C}_3\text{H}_7.\text{S}} \cdot S_{\text{H}.\text{S}}}{K_{S1}} \right) \text{ where } K_{S1} = k_2/k_{-2}$$

$$\text{Putting } R_{S1}=0 \text{ and solving we get } S_{\text{C}_3\text{H}_8.\text{S}} = \frac{S_{\text{C}_3\text{H}_7.\text{S}} \cdot S_{\text{H}.\text{S}}}{K_{S1} \cdot S_S} \dots \dots \dots (1)$$

Similarly, for the second surface reaction step

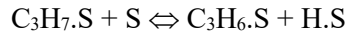

let  $k_3$  and  $k_{-3}$  be the rate constants for forward and backward reactions. Then

$$R_{S2} = k_3 \cdot S_{\text{C}_3\text{H}_7.\text{S}} \cdot S_S - k_{-3} \cdot S_{\text{C}_3\text{H}_6.\text{S}} \cdot S_{\text{H}.\text{S}} \text{ or } k_3 (S_{\text{C}_3\text{H}_7.\text{S}} \cdot S_S - \frac{k_{-3} \cdot S_{\text{C}_3\text{H}_6.\text{S}} \cdot S_{\text{H}.\text{S}}}{k_3})$$

$$R_{S2} = k_3 \left( S_{\text{C}_3\text{H}_7.\text{S}} \cdot S_S - \frac{S_{\text{C}_3\text{H}_6.\text{S}} \cdot S_{\text{H}.\text{S}}}{K_{S2}} \right) \text{ where } K_{S2} = k_3/k_{-3}$$

$$\text{Putting } R_{S2}=0 \text{ and solving we get } S_{\text{C}_3\text{H}_7.\text{S}} = \frac{S_{\text{C}_3\text{H}_6.\text{S}} \cdot S_{\text{H}.\text{S}}}{K_{S2} \cdot S_S} \dots \dots \dots (2)$$

Consider the desorption reaction  $\text{C}_3\text{H}_6.\text{S} \rightleftharpoons \text{C}_3\text{H}_6 + \text{S}$  and let  $k_4$  and  $k_{-4}$  be the rate constants for forward and backward reactions. Then similarly

$$R_{D1} = k_4 \cdot S_{\text{C}_3\text{H}_6.\text{S}} - k_{-4} \cdot P_{\text{C}_3\text{H}_6} \cdot S_S$$

$$R_{D1} = k_4 \left( S_{\text{C}_3\text{H}_6.\text{S}} - \frac{P_{\text{C}_3\text{H}_6} \cdot S_S}{K_{D1}} \right) \text{ where } K_{D1} = k_4/k_{-4}$$

$$\text{Putting } R_{D1} \approx 0, \text{ we get } S_{\text{C}_3\text{H}_6.\text{S}} = \frac{P_{\text{C}_3\text{H}_6} \cdot S_S}{K_{D1}} \dots \dots \dots (3)$$

Similarly for the second desorption reaction  $2\text{H}.\text{S} \rightleftharpoons \text{H}_2 + 2\text{S}$  and let  $k_5$  and  $k_{-5}$  be the rate constants for forward and backward reactions. Then similarly

$$R_{D2} = k_5 \cdot S_{\text{H}.\text{S}}^2 - k_{-5} \cdot P_{\text{H}_2} \cdot S_S^2$$

$$R_{D2} = k_5 \cdot (S_{\text{H}.\text{S}}^2 - \frac{P_{\text{H}_2} \cdot S_S^2}{K_{D2}}) \text{ where } K_{D2} = k_5/k_{-5}$$

$$\text{Putting } R_{D2} \approx 0, \text{ we get } S_{\text{H}.\text{S}} = \sqrt{\frac{P_{\text{H}_2}}{K_{D2}}} \cdot S_S \dots \dots \dots (4)$$

Total site balance can be written as

$$S_t = S_v + S_{\text{C}_3\text{H}_7.\text{S}} + S_{\text{C}_3\text{H}_6.\text{S}} + S_{\text{H}.\text{S}} + S_S$$

Replacing each of the above values from equations (1), (2), (3) and (4) we get

$$S_t = \left( \frac{S_{\text{C}_3\text{H}_7.\text{S}} \cdot S_{\text{H}.\text{S}}}{K_{S1} \cdot S_S} + \frac{S_{\text{C}_3\text{H}_6.\text{S}} \cdot S_{\text{H}.\text{S}}}{K_{S2} \cdot S_S} + \frac{P_{\text{C}_3\text{H}_6} \cdot S_S}{K_{D1}} + \sqrt{\frac{P_{\text{H}_2}}{K_{D2}}} \cdot S_S + S_S \right)$$

$$S_t = \left( \frac{S_{C3H7} \cdot S_H \cdot S^2}{K_{S1} \cdot S_S^2 \cdot K_{S2}} + \frac{P_{C3H6} \cdot S_H \cdot S \cdot S_S}{K_{S2} \cdot S_S \cdot K_{D1}} + \frac{P_{C3H6} \cdot S_S}{K_{D1}} + \sqrt{\frac{P_{H2}}{K_{D2}}} \cdot S_S + S_S \right)$$

$$S_t = \left( \frac{P_{C3H6} \cdot S_H \cdot S^2 \cdot S_S}{K_{S1} \cdot S_S^2 \cdot K_{S2} \cdot K_{D1}} + \frac{P_{C3H6} \cdot P_{H2}^{1/2} \cdot S_S}{K_{S2} \cdot K_{D2}^{1/2} \cdot K_{D1}} + \frac{P_{C3H6} \cdot S_S}{K_{D1}} + \sqrt{\frac{P_{H2}}{K_{D2}}} \cdot S_S + S_S \right)$$

$$S_t = \left( \frac{P_{C3H6} \cdot P_{H2} \cdot S_S}{K_{S1} \cdot K_{D2} \cdot K_{S2} \cdot K_{D1}} + \frac{P_{C3H6} \cdot P_{H2}^{1/2} \cdot S_S}{K_{S2} \cdot K_{D2}^{1/2} \cdot K_{D1}} + \frac{P_{C3H6} \cdot S_S}{K_{D1}} + \sqrt{\frac{P_{H2}}{K_{D2}}} \cdot S_S + S_S \right)$$

$$S_t = \left[ \left( \frac{P_{C3H6} \cdot P_{H2}}{K_{S1} \cdot K_{D2} \cdot K_{S2} \cdot K_{D1}} \right) + \frac{P_{C3H6} \cdot P_{H2}^{1/2}}{K_{S2} \cdot K_{D2}^{1/2} \cdot K_{D1}} + \frac{P_{C3H6}}{K_{D1}} + \sqrt{\frac{P_{H2}}{K_{D2}}} + 1 \right] \cdot S_S$$

$$S_S = \frac{S_t}{\left( \frac{P_{C3H6} \cdot P_{H2}}{K_{S1} \cdot K_{D2} \cdot K_{S2} \cdot K_{D1}} \right) + \frac{P_{C3H6} \cdot P_{H2}^{1/2}}{K_{S2} \cdot K_{D2}^{1/2} \cdot K_{D1}} + \frac{P_{C3H6}}{K_{D1}} + \sqrt{\frac{P_{H2}}{K_{D2}}} + 1}$$

Substituting equations (5) and (1) in equation (A), we get

$$R_A = k_1 \left( S_S \cdot P_{C3H8} - \frac{P_{C3H6} \cdot P_{H2} \cdot S_S}{K_{S1} \cdot K_{D2} \cdot K_{S2} \cdot K_{D1}} \right)$$

$$R_A = \frac{k_1 \cdot S_t}{\left( \frac{P_{C3H6} \cdot P_{H2}}{K_{S1} \cdot K_{D2} \cdot K_{S2} \cdot K_{D1}} \right) + \frac{P_{C3H6} \cdot P_{H2}^{1/2}}{K_{S2} \cdot K_{D2}^{1/2} \cdot K_{D1}} + \frac{P_{C3H6}}{K_{D1}} + \sqrt{\frac{P_{H2}}{K_{D2}}} + 1} \cdot \left( P_{C3H8} - \frac{P_{C3H6} \cdot P_{H2}}{K_{S1} \cdot K_{D2} \cdot K_{S2} \cdot K_{D1}} \right)$$

Considering  $P_{C3H6}$  and  $P_{H2}$  as zero for initial kinetics,

$$R_A = k_1 \cdot S_t \cdot P_{C3H8}$$

$$R_A = K_1 \cdot P_{C3H8} \text{ where } K_1 = k_1 \cdot S_t$$

Using this equation, we can plot between Rate and partial pressure of propane at different temperatures to find the value of k.

Graphs at these temperatures are given below.

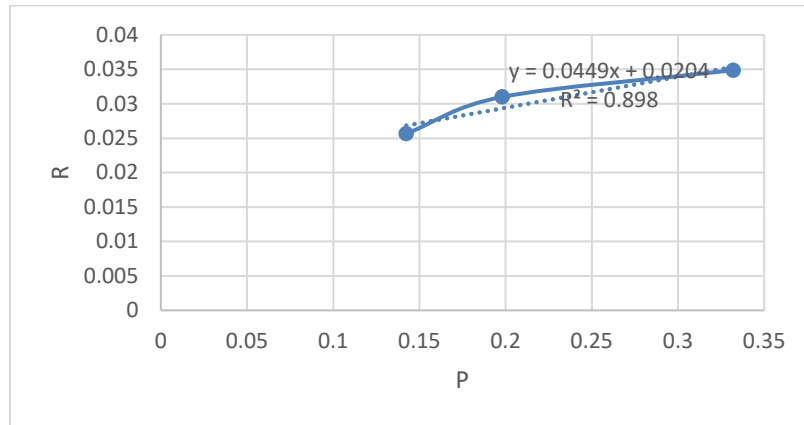

Fig 2 a) T=350 °C



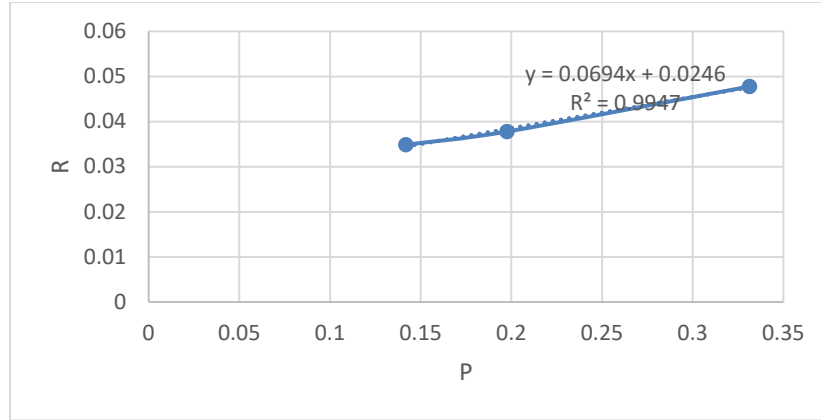

Fig 2 b) T= 375 °C

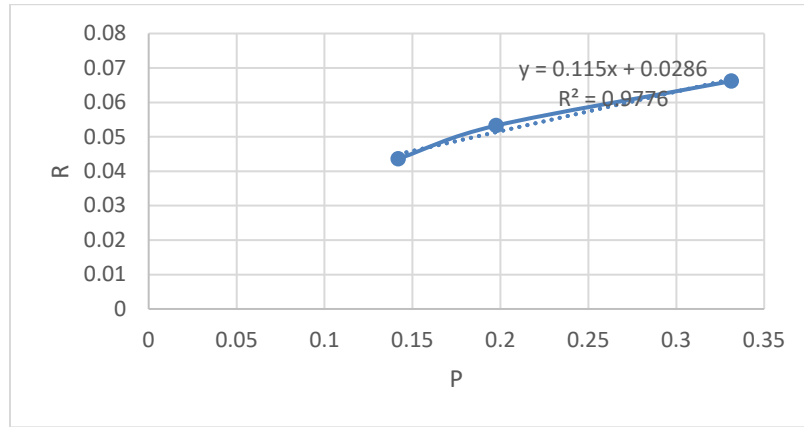

Fig 2 c) T= 400 °C

From these graphs the evaluated k values are represented in table as follows:

| Temperature (°C) | Value of k (μmol/g.s.atm) | Rate equation |
|------------------|---------------------------|---------------|
| 350              | 0.044933325               | R=0.0442*p    |
| 375              | 0.06936238                | R=0.1876*p    |
| 400              | 0.114966586               | R=0.3111*p    |

### C) Surface Reaction 1 as rate limiting step

Consider the surface reaction as  $C_3H_8.S + S \rightleftharpoons C_3H_7.S + H.S$

Then  $R_{S1} = k_2 \cdot S_{C_3H_8.S} - k_{-2} \cdot S_{C_3H_7.S} \cdot S_{H.S}$

Or  $R_{S1} = k_2 \left( S_{C_3H_8.S} - \frac{1}{K_{S1}} \cdot S_{C_3H_7.S} \cdot S_{H.S} \right)$

From adsorption step,

$$P_{C_3H_8} S_S = \frac{S_{C_3H_8.S}}{K_A}$$

$$S_{C_3H_8.S} = K_A \cdot S_S P_{C_3H_8}$$

$$S_{C_3H_8.S} = S_S \frac{P_{C_3H_6} P_{H_2}^{1/2}}{K_{S_2} \cdot K_{D_2} \cdot K_{D_1}}$$

$$S_{H.S} = S_S \cdot \frac{P_{H_2}^{1/2}}{K_{D_2}^{1/2}}$$

$$\text{Therefore, } R_{S1} = k_2 \left( K_A \cdot S_S^2 P_{C_3H_8} - \frac{P_{C_3H_6} P_{H_2}}{K_{S_2} K_{D_1} K_{D_2}^{3/2}} S_S^2 \right)$$

From total sites,

$$S_t = \left( K_A \cdot P_{C_3H_8} \cdot S_S + S_S \frac{P_{C_3H_6} \cdot P_{H_2}^{1/2}}{K_{S_2} \cdot K_{D_2} \cdot K_{D_1}} + \frac{P_{C_3H_6} \cdot S_S}{K_{D_1}} + \sqrt{\frac{P_{H_2}}{K_{D_2}}} S_S + S_S \right)$$

$$S_t = \left( K_A \cdot P_{C_3H_8} + \frac{P_{C_3H_6} \cdot P_{H_2}^{1/2}}{K_{S_2} \cdot K_{D_2} \cdot K_{D_1}} + \frac{P_{C_3H_6}}{K_{D_1}} + \sqrt{\frac{P_{H_2}}{K_{D_2}}} + 1 \right) \cdot S_S$$

$$R_{S1} = \frac{K_2 \cdot S_t^2}{\left( K_A \cdot P_{C_3H_8} + \frac{P_{C_3H_6} \cdot P_{H_2}^{1/2}}{K_{S_2} \cdot K_{D_2} \cdot K_{D_1}} + \frac{P_{C_3H_6}}{K_{D_1}} + \sqrt{\frac{P_{H_2}}{K_{D_2}}} + 1 \right)^2} \left( K_A \cdot P_{C_3H_8} - \frac{P_{C_3H_6} P_{H_2}}{K_{S_2} K_{D_1} K_{D_2}^{3/2}} \right)$$

Considering  $P_{C_3H_6}$  and  $P_{H_2}$  as zero for initial kinetics,

$$R_{S1} = \frac{K_2 \cdot S_t^2 \cdot K_A \cdot P_{C_3H_8}}{(K_A \cdot P_{C_3H_8} + 1)^2} \quad \text{OR} \quad R_{S1} = \frac{k \cdot K_A \cdot P_{C_3H_8}}{(K_A \cdot P_{C_3H_8} + 1)^2} \quad \text{where } k = K_2 \cdot S_t^2$$

Parameters  $k$  and  $K_M$  of these equations are estimated by non-linear regression analysis minimizing the sum of the squared differences of calculated and experimental  $CH_4$  reforming rates using the Levenberg–Marquardt algorithm provided in the computer software POLYMATH 5.1 environment.

Polymath results for all three temperatures are given below:

| Temperature (°C) | k (μmol <sup>2</sup> /g <sup>2</sup> .s) | K <sub>A</sub> (1/atm) | Rate equation                                                                       |
|------------------|------------------------------------------|------------------------|-------------------------------------------------------------------------------------|
| 350              | 0.1436872                                | 2.20326                | $R_{S1} = 0.1436872 \frac{2.20326 \cdot P_{C_3H_8}}{(K_A \cdot P_{C_3H_8} + 1)^2}$  |
| 375              | 0.198852                                 | 1.917504               | $R_{S1} = 0.198852 \frac{1.917504 \cdot P_{C_3H_8}}{(K_A \cdot P_{C_3H_8} + 1)^2}$  |
| 400              | 0.2948139                                | 1.560042               | $R_{S1} = 0.2948139 \frac{1.560042 \cdot P_{C_3H_8}}{(K_A \cdot P_{C_3H_8} + 1)^2}$ |

#### D) Surface Reaction 2 as rate limiting step

Consider the surface reaction as  $C_3H_7.S + S \rightleftharpoons C_3H_6.S + H.S$

Then  $R_{S2} = k_3 \cdot S_{C_3H_7.S} S_S - k_{-3} \cdot S_{C_3H_6.S} \cdot S_{H.S}$

Or  $R_{S2} = k_3 \left( S_{C_3H_7.S} S_S - \frac{1}{K_{S_2}} \cdot S_{C_3H_6.S} \cdot S_{H.S} \right)$  where  $K_{S_2} = k_3/k_{-3}$

From adsorption step,

$$K_A P_{C_3H_8} S_S = \frac{S_{C_3H_7.S} \cdot S_{H.S}}{K_{S1} S_S} = \frac{S_{C_3H_7.S} P_{H_2}^{1/2}}{K_{S1} K_{D_2}^{1/2}}$$

$$S_{C_3H_7.S} = \frac{K_{D_2}^{1/2} \cdot K_A \cdot S_S \cdot P_{C_3H_8}}{P_{H_2}^{1/2}}$$

$$S_{C_3H_6.S} = S_S \frac{P_{C_3H_6}}{K_{D1}}$$

$$S_{H.S} = S_S \cdot \frac{P_{H2}^{1/2}}{K_{D2}^{1/2}}$$

$$\text{Therefore, } R_{S2} = k_3 \left( \frac{K_A \cdot K_{S1} \cdot K_{D2}^{1/2} \cdot P_{C3H8}}{P_{H2}^{1/2}} \cdot S_S^2 - \frac{P_{C3H6} \cdot P_{H2}^{1/2}}{K_{S2} K_{D1} K_{D2}^{1/2}} S_S^2 \right)$$

$$R_{S2} = k_3 \cdot S_S^2 \left( \frac{K_A \cdot K_{S1} \cdot K_{D2}^{1/2} \cdot P_{C3H8}}{P_{H2}^{1/2}} - \frac{P_{C3H6} \cdot P_{H2}^{1/2}}{K_{S2} K_{D1} K_{D2}^{1/2}} \right)$$

It is obvious from the experimental data that this equation does not fits to the reaction kinetics.

### E) C<sub>3</sub>H<sub>6</sub> DESORPTION as rate limiting step

Consider the desorption reaction as C<sub>3</sub>H<sub>6</sub>.S  $\rightleftharpoons$  C<sub>3</sub>H<sub>6</sub> + S

$$\text{Then } R_{D1} = k_4 \cdot S_{C3H6} - k_{-4} \cdot P_{C3H6} \cdot S_S$$

$$\text{Or } R_{D1} = k_4 \left( S_{C3H7.S} - \frac{1}{K_{D1}} \cdot P_{C3H6} \cdot S_S \right) \quad \text{where } K_{D1} = k_4/k_{-4}$$

From adsorption step,

$$S_{C3H8} = K_A P_{C3H8} \cdot S_S$$

$$\frac{S_{C3H7.S} \cdot S_{H.S}}{K_{S1} \cdot S_S} = K_A \cdot S_S \cdot P_{C3H8}$$

$$\frac{S_{C3H6.S} \cdot S_{H.S}^2}{K_{S1} \cdot K_{S2} \cdot S_S^2} = K_A \cdot S_S \cdot P_{C3H8}$$

$$S_{C3H6.S} = K_{S1} \cdot K_{S2} \cdot K_A \cdot S_S^3 P_{C3H8}$$

$$S_{C3H6.S} = K_{S1} \cdot K_{S2} K_A S_S K_{D2} \frac{P_{C3H8}}{P_{H2}}$$

$$\text{Therefore, } R_{D1} = k_4 \left( \frac{K_A \cdot K_{S1} \cdot K_{S2} \cdot P_{C3H8}}{P_{H2}^{1/2}} - \frac{P_{C3H6}}{K_{D1}} \right)$$

$$R_{S2} = k_3 \cdot S_S^2 \left( \frac{K_A \cdot K_{S1} \cdot K_{D2}^{1/2} \cdot P_{C3H8}}{P_{H2}^{1/2}} - \frac{P_{C3H6} \cdot P_{H2}^{1/2}}{K_{S2} K_{D1} K_{D2}^{1/2}} \right) \cdot S_S$$

$$S_t = \left( P_{C3H8} \cdot K_A \cdot S_S + \frac{K_A \cdot K_{S1} \cdot P_{C3H8} \cdot K_{D2}^{1/2} S_S}{P_{H2}^{1/2}} + \frac{K_A \cdot K_{S1} \cdot P_{C3H8} \cdot S_S}{P_{H2}} + \sqrt{\frac{P_{H2}}{K_{D2}}} \cdot S_S + S_S \right)$$

$$S_S = \frac{S_t}{P_{C3H8} \cdot K_A + \frac{K_A \cdot K_{S1} \cdot P_{C3H8} \cdot K_{D2}^{1/2}}{P_{H2}^{1/2}} + \frac{K_A \cdot K_{S1} \cdot P_{C3H8}}{P_{H2}} + \sqrt{\frac{P_{H2}}{K_{D2}}} + 1}$$

It is obvious from the experimental data that this equation does not fits to the reaction kinetics.

### F) H<sub>2</sub> DESORPTION as rate limiting step

Consider the desorption reaction as 2H.S  $\rightleftharpoons$  H<sub>2</sub> + 2S

$$\text{Then } R_{D2} = k_5 \cdot S_{H2} - k_{-5} \cdot P_{H2} \cdot S_S^2$$

$$\text{Or } R_{D2} = k_5 \left( S_{H2}^2 - \frac{1}{K_{D2}} \cdot P_{H2} \cdot S_S^2 \right) \quad \text{where } K_{D2} = k_5/k_{-5}$$

From adsorption step,

$$S_{C3H8} = K_A P_{C3H8} \cdot S_S$$

$$\frac{S_{C3H7.S} \cdot S_{H.S}}{K_{S1} \cdot S_S} = K_A \cdot S_S \cdot P_{C3H8}$$

$$\frac{S_{C3H6.S} \cdot S_{H.S}^2}{K_{S1} \cdot K_{S2} \cdot S_S^2} = K_A \cdot S_S \cdot P_{C3H8}$$

$$\frac{P_{C_3H_6} \cdot S_{H_2}^2}{K_{D_1} \cdot K_{S_1} \cdot K_{S_2}} = K_A \cdot S_S^2 P_{C_3H_8}$$

$$S_{H_2}^2 = K_{S_1} \cdot K_{S_2} \cdot K_{D_1} \cdot K_A \cdot S_S^2 \frac{P_{C_3H_8}}{P_{C_3H_6}}$$

$$\text{Therefore, } R_{D_2} = k_5 \cdot S_S^2 \cdot \left( \frac{K_A \cdot K_{S_1} \cdot K_{S_2} \cdot K_{D_1} \cdot P_{C_3H_8}}{P_{C_3H_6}} - \frac{P_{H_2}}{K_{D_2}} \right)$$

It is obvious from the experimental data that this equation does not fits to the reaction kinetics.

Using these expressions  $R_{\text{calculated}}$  have been evaluated and are tabulated with  $R_{\text{observed}}$  as follows:

| $R_{\text{observed}}$ | $R_{\text{calculated}}$ (Power law rate equation) | $R_{\text{calculated}}$ (Adsorption as rate limiting step) | $R_{\text{calculated}}$ (Surface reaction as rate limiting) |
|-----------------------|---------------------------------------------------|------------------------------------------------------------|-------------------------------------------------------------|
| 0.025660052           | 0.026381545                                       | 0.006395834                                                | 0.02611434                                                  |
| 0.030999161           | 0.029621185                                       | 0.008902323                                                | 0.030394758                                                 |
| 0.034865864           | 0.034276739                                       | 0.009845831                                                | 0.033442231                                                 |
| 0.034875502           | 0.035499747                                       | 0.014926613                                                | 0.035061115                                                 |
| 0.037784203           | 0.038854241                                       | 0.013706816                                                | 0.039627897                                                 |
| 0.043612914           | 0.044266469                                       | 0.016314069                                                | 0.043749837                                                 |
| 0.04778443            | 0.04726633                                        | 0.02299228                                                 | 0.047245724                                                 |
| 0.05326258            | 0.051979125                                       | 0.022712016                                                | 0.053091497                                                 |
| 0.066185001           | 0.066817607                                       | 0.038099849                                                | 0.066231715                                                 |

The graphs between the calculated and observed values are shown in the figures.

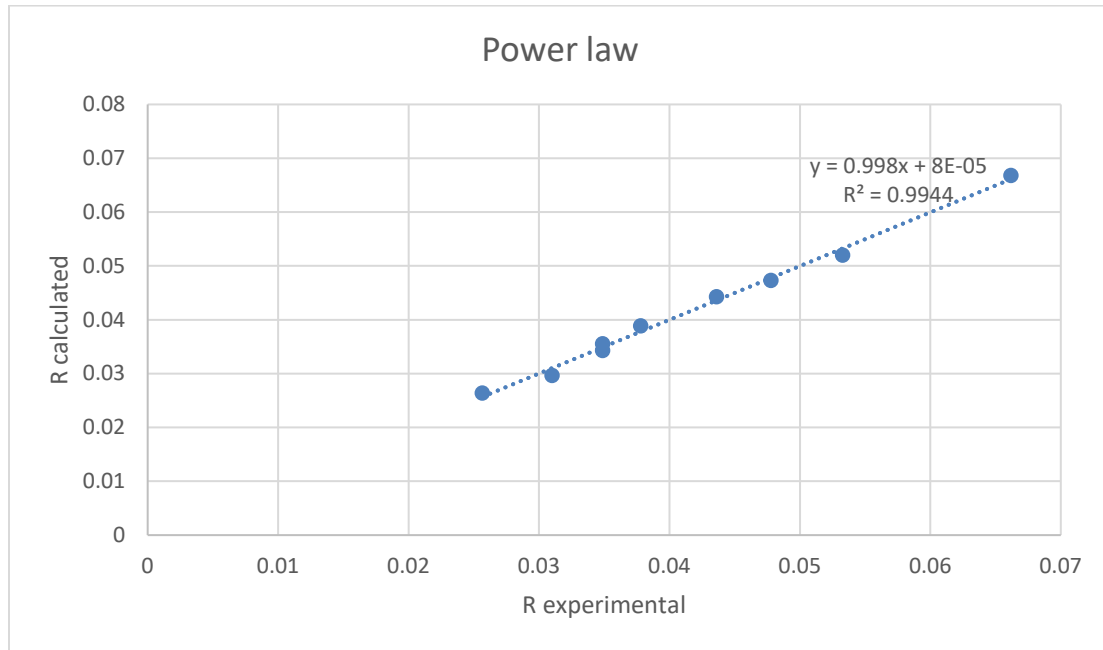



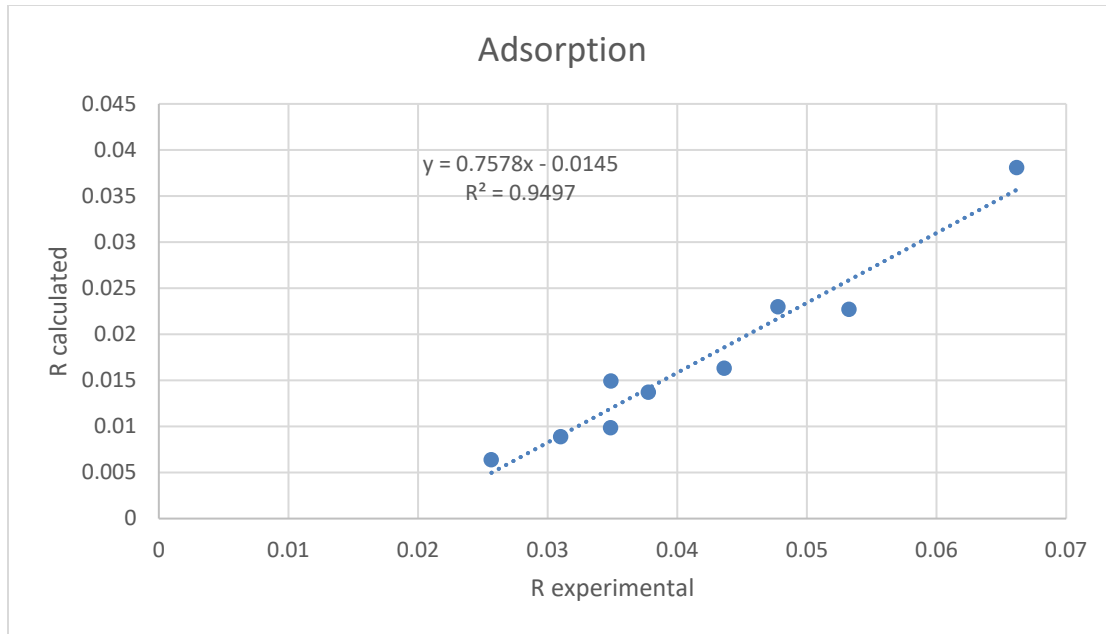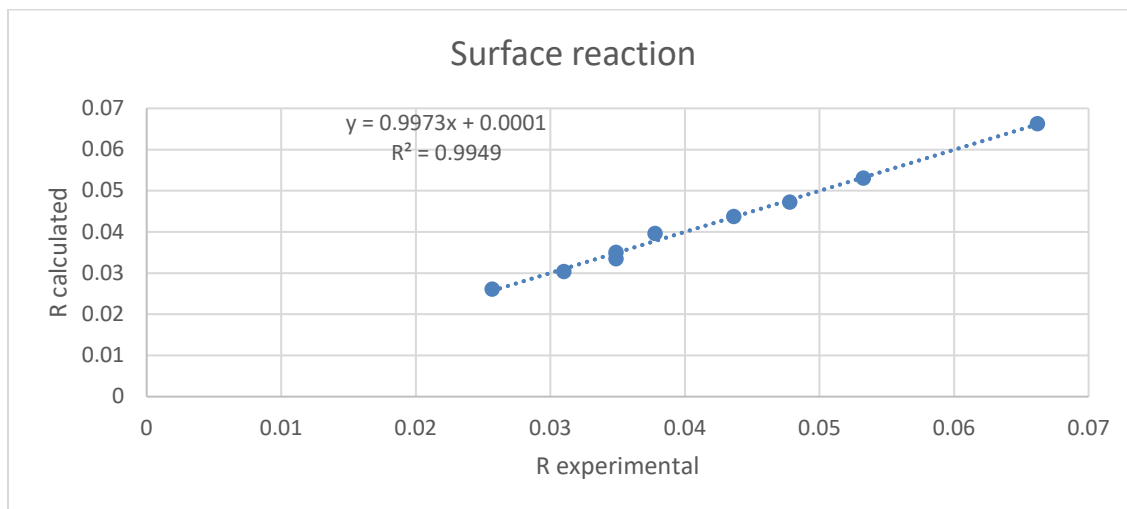

It is clear from the graph that adsorption reaction rate limiting step is the best fit mechanism for the dehydrogenation of propane. Also, it is heterogeneous reaction, hence adsorption reaction limiting model is superior to power law rate equation (generally used for homogeneous catalyst).

### ACTIVATION ENERGY

Activation energy for the Propane dehydrogenation process is found by using the Arrhenius equation.

$$k = k_0 e^{\frac{-E}{RT}}$$

A plot between  $\ln k$  and  $1/T$  is plotted having the slope  $-E/R$  and intercept as  $\ln k_0$

Activation energies have been evaluated for the power law rate equation, adsorption as rate limiting and surface reaction as rate limiting steps. Their graphs and tables are shown below:

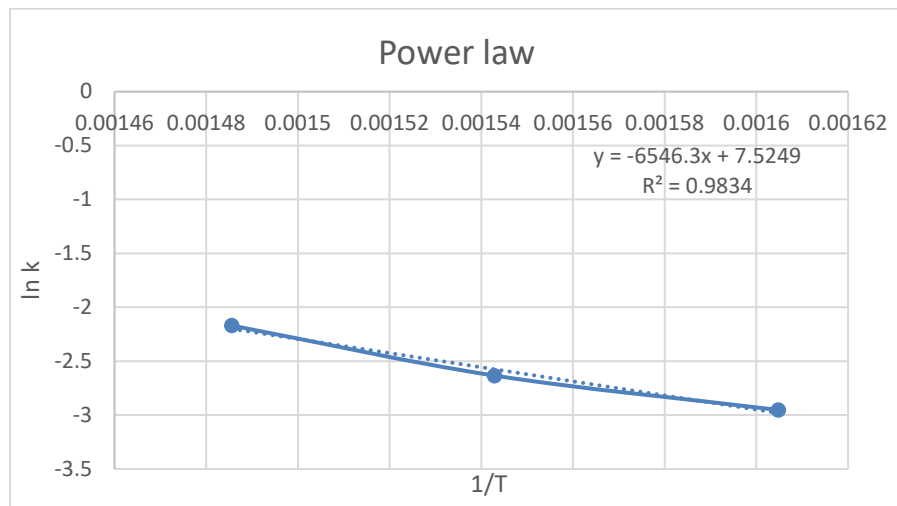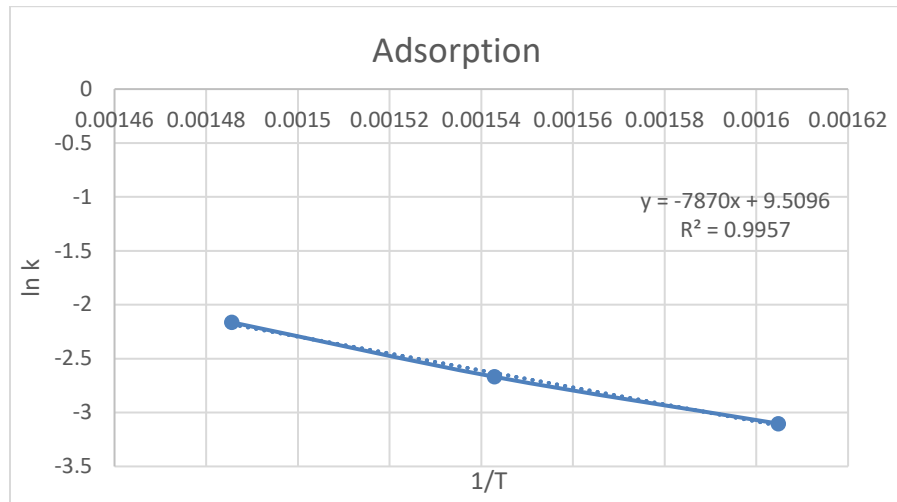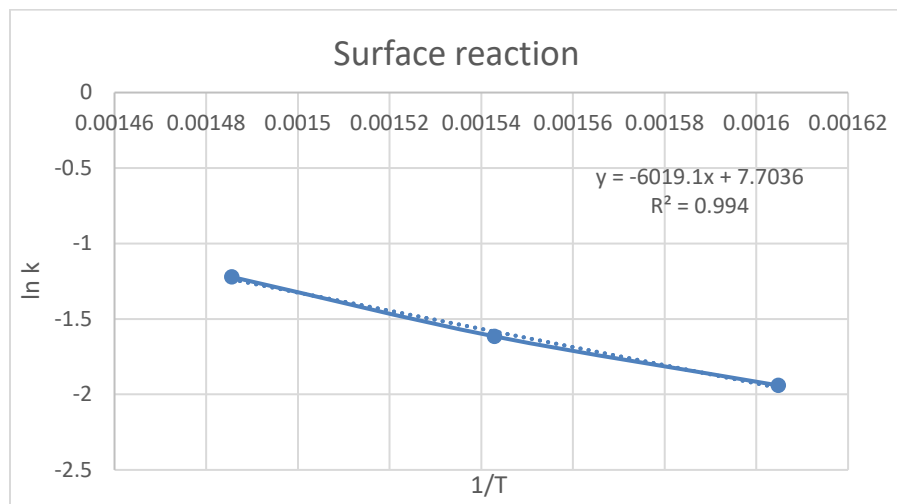

**Table.S3** Derived Activation energy and Arrhenius constant

| Rate Expression                                                          | Activation energy | Arrhenius constant |
|--------------------------------------------------------------------------|-------------------|--------------------|
| $R_{S1} = \frac{k \cdot K_A \cdot P_{C3H8}}{(K_A \cdot P_{C3H8} + 1)^2}$ | 50.04147 KJ/mole  | 2216.398           |
| $R_A = K_1 \cdot P_{C3H8}$                                               | 65.42903 KJ/mole  | 13488.96           |
| $R_{C3H8} = k(p_{C3H8})^m$                                               | 54.42437 KJ/mole  | 1853.641           |

From these three equations the graph fitted to the experimental data is adsorption rate limiting step. Hence by using the Arrhenius plot of the surface reaction rate limiting mechanism the activation energy for the reaction is found to be 50.04147 KJ/mole.
